# Supplementary material for: Biobased copolyesters from renewable resources: synthesis and crystallization behavior of poly(decamethylene sebacate-co-isosorbide sebacate)
Source: Royal Society of Chemistry journal article supplement (doi:10.1039/c5ra04761g), 2015-01-01
Supplement: c5ra04761g1.pdf [file c5ra04761g1.pdf]

## Supplementary Information

### Biobased copolyesters from renewable resources: Synthesis and crystallization behavior of poly(decamethylene sebacate-*co*-isosorbide sebacate)

Zhiyong Wei, Cheng Zhou, Yang Yu, Yang Li

*State Key Laboratory of Fine Chemicals, Department of Polymer Science and Materials, School of  
Chemical Engineering, Dalian University of Technology, Dalian 116024, China*

Corresponding author. *E-mail address:* liyang@dlut.edu.cn (Y. Li)

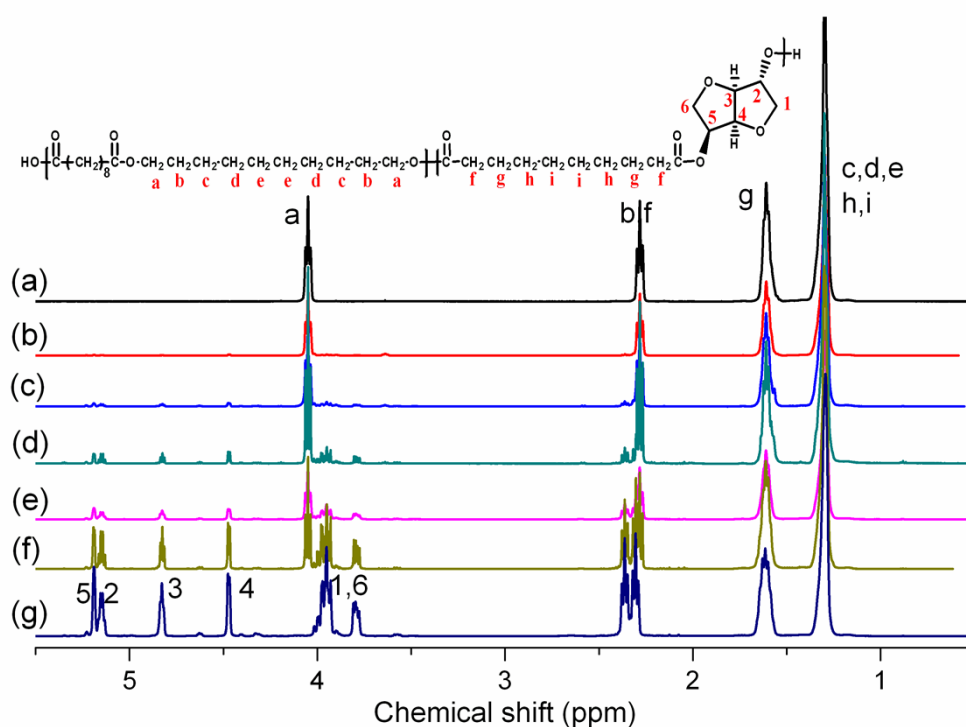

**Fig. S1** <sup>1</sup>H-NMR spectra of P(DS-*co*-IS) copolyesters: (a) PDS, (b) P(DS-*co*-5.3mol%IS), (c) P(DS-*co*-16.7mol%IS), (d) P(DS-*co*-25.4mol%IS), (e) P(DS-*co*-43.9mol%IS), (f) P(DS-*co*-66.2mol%IS), (g) PIS.

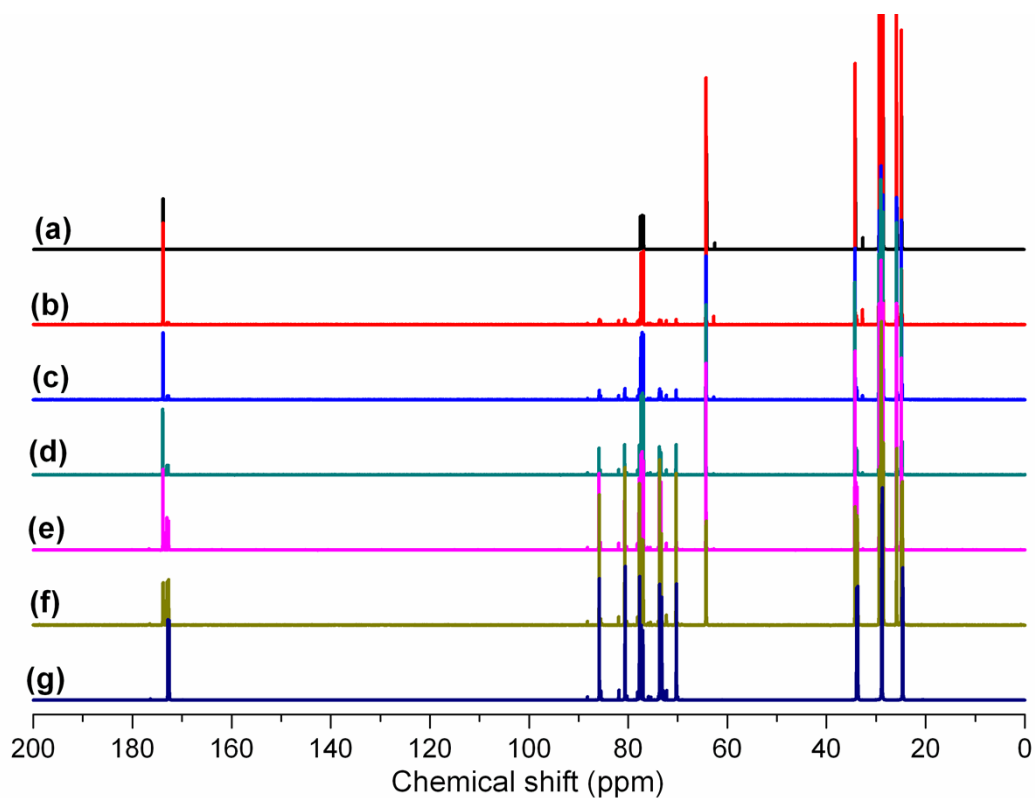

**Fig. S2**  $^{13}\text{C}$ -NMR spectra of P(DS-*co*-IS) copolyesters: (a) PDS, (b) P(DS-*co*-5.3mol%IS), (c) P(DS-*co*-16.7mol%IS), (d) P(DS-*co*-25.4mol%IS), (e) P(DS-*co*-43.9mol%IS), (f) P(DS-*co*-66.2mol%IS), (g) PIS.

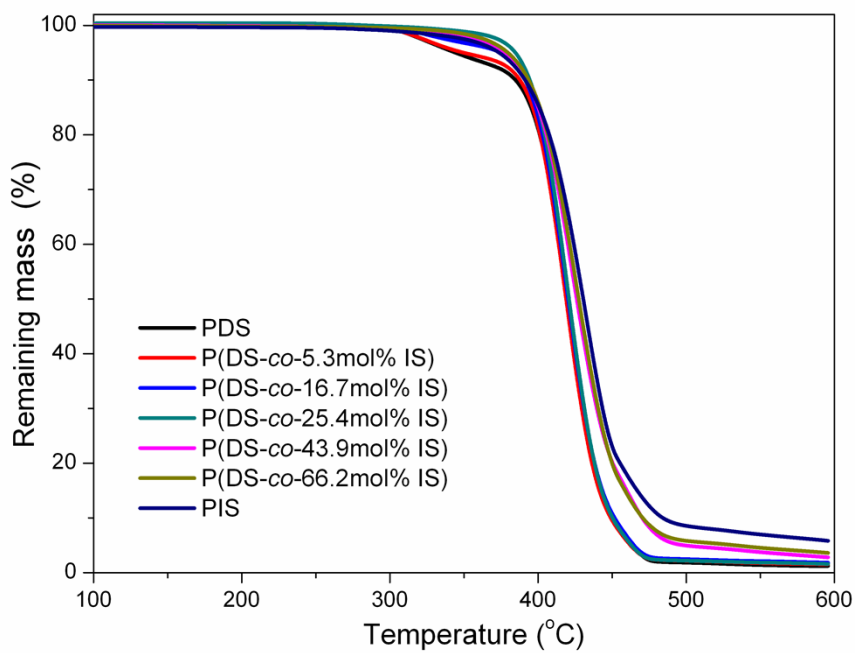

**Fig. S3** TGA curves of P(DS-*co*-IS) copolyesters
